# Supplementary material
Source: PubMed Central journal article supplement (PMC7983864)
Supplement: NIHMS1669546-supplement-SI.pdf [file NIHMS1669546-supplement-SI.pdf]

This is a supplement to the paper:

**Importance of secondary sources in the atmospheric budgets of formic and acetic acids**

by F. Paulot, D. Wunch, J. D. Crouse, G. C. Toon, D. B. Millet, P. F. DeCarlo, C. Vigouroux, N. Deutscher, G. González Abad, J. Notholt, T. Warneke, J. W. Hannigan, C. Warneke, J. A. de Gouw, E. J. Dunlea, M. De Mazière, D. W. T. Griffith, P. Bernath, J. L. Jimenez, P. O. Wennberg

## Yield of formic and acetic acids from the from the oxidation of glycolaldehyde and hydroxyacetone by OH

The photooxidation of glycolaldehyde yields FA (Butkovskaya et al., 2006a). The yield of FA decreases while the yield of  $\text{CH}_2\text{O}$  increases as temperature increases. This is likely related to the channel  $\text{CO} + \text{HCOOH} + \text{OH}$  (R2) since the increased production of FA is accompanied by an increased production of OH. To simplify the representation of this reaction, we divide the oxidation of glycolaldehyde by OH into two different pathways

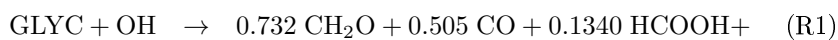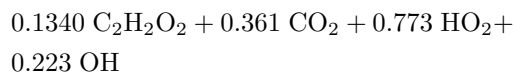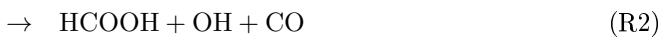

The branching ratio between the pathways (R1) and (R2) is calculated using the measured yield of  $\text{CH}_2\text{O}$  and  $\text{HCOOH}$  at different temperatures :  $Y_1 = 1 - 5.01 \times 10^{-6} \times \exp(\frac{2612}{T})$ .

FA and AA are also formed in the photooxidation of hydroxyacetone (Butkovskaya et al., 2006b). The yields of FA and AA are obtained by assuming  $Y_{\text{FA}} = Y_{\text{AA}}$  and  $Y_{\text{FA}} + Y_{\text{AA}} + Y_{\text{C}_3\text{H}_4\text{O}_2} = 1$  which yields

$$\beta(T) = Y_{\text{FA}} + Y_{\text{AA}} = 2.63 \times 10^{-3} \times \exp(1206/T) \quad (\text{R3})$$

## Retrieval of FA by ground FTS

### Method

For all stations but Thule and La Réunion, FA is retrieved from spectra using GFIT (Wunch et al., 2010). For Thule (Hannigan et al., 2009) and La Réunion (Senten et al., 2008), FA is retrieved using SFIT2 (Rinsland et al., 1998). Both retrieval methods consist of a “forward model”, which computes an atmospheric transmittance spectrum for a prescribed set of conditions, and an “inverse method” which compares each measured spectrum with the calculation, and decides how best to modify the a priori profile to achieve a better match. GFIT scales the a priori profile via a non-linear least-squares spectral fitting algorithm. SFIT2 enables to retrieve a vertical profile by the use of the optimal estimation method (Rodgers, 2000). **However, in the case of FA, the degrees of freedom of the signal are close to one**, such that the essential result is the total column, as for GFIT.

The a priori altitude, pressure, temperature and specific humidity profiles used in GFIT and SFIT2 are from NCEP/NCAR analysis product (Kalnay et al., 1996) with the exception of the cruises in the Atlantic ocean. The window used to retrieve FA is centered at  $1106.32 \text{ cm}^{-1}$  with a width of  $6.75 \text{ cm}^{-1}$ . For La Réunion, a smaller window ( $1102.75 - 1106.4 \text{ cm}^{-1}$ ) is used to avoid the strong water band at  $1106.7 \text{ cm}^{-1}$ .

Interfering gases are  $\text{H}_2\text{O}$ ,  $\text{O}_3$ ,  $\text{HDO}$ ,  $\text{CH}_4$ ,  $\text{NH}_3$ ,  $\text{CCl}_2\text{F}_2$  and  $\text{CHClF}_2$  (+  $\text{H}_2^{18}\text{O}$ ,  $\text{H}_2^{17}\text{O}$ ,  $^{16}\text{O}^{16}\text{O}^{18}\text{O}$  for La Réunion). For La Réunion, the profile of  $\text{H}_2\text{O}$ ,  $\text{O}_3$ ,  $\text{HDO}$ ,  $\text{CCl}_2\text{F}_2$  and  $\text{CHClF}_2$  is first retrieved using dedicated windows for each target molecule. Their profiles are then used to retrieve FA.

The FA retrieval is especially sensitive to the  $\text{H}_2\text{O}$  and  $\text{O}_3$  profiles. We find that small modifications of the water spectroscopy in the FA window reduces the residuals. These modifications are :

- increase in the pressure shift from  $-0.0175$  to  $-0.0210 \text{ cm}^{-1}/\text{atm}$
- increase in the width from  $0.061$  to  $0.062 \text{ cm}^{-1}/\text{atm}$
- increase in the temperature dependence of the width from  $0.29$  to  $0.45$ .

These modifications were applied in the retrieval at Barcroft, Bremen, Paramaribo and Wollongong as well as for the cruises.

For the cruises, we use measured  $\text{H}_2\text{O}$  and  $\text{O}_3$  vertical profiles over the ship by balloon-borne radio and ozone sonde.

For Paramaribo, the  $\text{O}_3$  profile is inferred from Shadoz measurements at the Paramaribo station (Thompson et al., 2003) combined with an ACE-FTS climatology.

For Thule,  $\text{H}_2\text{O}$  is retrieved by scaling  $\text{H}_2\text{O}$  a priori profile.  $\text{O}_3$  and  $\text{HCOOH}$  are retrieved simultaneously.

For Wollongong,  $\text{O}_3$  profiles are derived from monthly mean HALOE data (Russell et al., 1993).

---

## Error Analysis

### Error in the spectroscopy

The FA Q branch line intensity has an uncertainty of  $\sim 7\%$  (Vander Auwera et al., 2007) which translates into a  $\sim 7\%$  error in the retrieved FA total column. Fig. S1 illustrates the dependence of the retrieved FA at Paramaribo on the window used to retrieve FA (Table S1). The choice of the spectral microwindow used to retrieve FA could result in a systematic bias in the FA total column as large as  $\sim \pm 2.7 \times 10^{15}$  molec/cm<sup>2</sup>.

### Error in FA profile

Fig. S2 illustrates the effect of the a priori FA vertical profile (Fig. S3) on the retrieved FA total column at Paramaribo. FA retrieval at Barcroft, Bremen, Paramaribo, Thule and Wollongong as well as the Atlantic cruises use the FA vertical profile from the ATMOS mission as a priori. This profile assumes most FA is located in the boundary layer, i.e., that FA total column is driven by local sources. In contrast, the FA a priori vertical profile used in La Réunion (from PEM-tropics A (Hoell et al., 1999) and ACE-FTS (González Abad et al., 2009)) assumes that most FA peaks in the free troposphere, i.e., that FA total column is driven by transport. At Paramaribo, the modeled FA vertical profile shows evidence of both transport and local sources. The choice of a priori profile results in an uncertainty of  $\sim 17\%$  in the retrieved FA profile.

The overall uncertainty is thus  $\sim 19\%$  with a systematic bias up to  $\pm 2.7 \times 10^{15}$  molec/cm<sup>2</sup>.

Tab. S1: Windows used to retrieve FA

|    | Center ( $\text{cm}^{-1}$ ) | Width ( $\text{cm}^{-1}$ ) | Interfering Chemical Species                                                                                                                                                     |
|----|-----------------------------|----------------------------|----------------------------------------------------------------------------------------------------------------------------------------------------------------------------------|
| P  | 1090.00                     | 13.00                      | $\text{O}_3$ $\text{H}_2\text{O}$ $\text{HDO}$ $\text{CCl}_2\text{F}_2$ $\text{CHClF}_2$ $\text{CH}_4$ $\text{NH}_3$ $\text{CO}_2$ $\text{CH}_3\text{OH}$ $\text{CCl}_3\text{F}$ |
| Ps | 1091.50                     | 10.50                      | $\text{O}_3$ $\text{H}_2\text{O}$ $\text{HDO}$ $\text{CCl}_2\text{F}_2$ $\text{CHClF}_2$ $\text{CH}_4$ $\text{NH}_3$ $\text{CO}_2$ $\text{CH}_3\text{OH}$ $\text{CCl}_3\text{F}$ |
| Q  | 1106.32                     | 6.75                       | $\text{O}_3$ $\text{H}_2\text{O}$ $\text{HDO}$ $\text{CCl}_2\text{F}_2$ $\text{CHClF}_2$ $\text{CH}_4$ $\text{NH}_3$                                                             |
| Qs | 1104.60                     | 3.65                       | $\text{O}_3$ $\text{H}_2\text{O}$ $\text{HDO}$ $\text{CCl}_2\text{F}_2$ $\text{CHClF}_2$ $\text{CH}_4$ $\text{NH}_3$                                                             |
| R  | 1221.00                     | 12.00                      | $\text{O}_3$ $\text{H}_2\text{O}$ $\text{HDO}$ $\text{CCl}_2\text{F}_2$ $\text{CHClF}_2$ $\text{CH}_4$ $\text{NH}_3$ $\text{N}_2\text{O}$                                        |
| Rs | 1119.00                     | 8.00                       | $\text{O}_3$ $\text{H}_2\text{O}$ $\text{HDO}$ $\text{CCl}_2\text{F}_2$ $\text{CHClF}_2$ $\text{CH}_4$ $\text{NH}_3$ $\text{N}_2\text{O}$                                        |

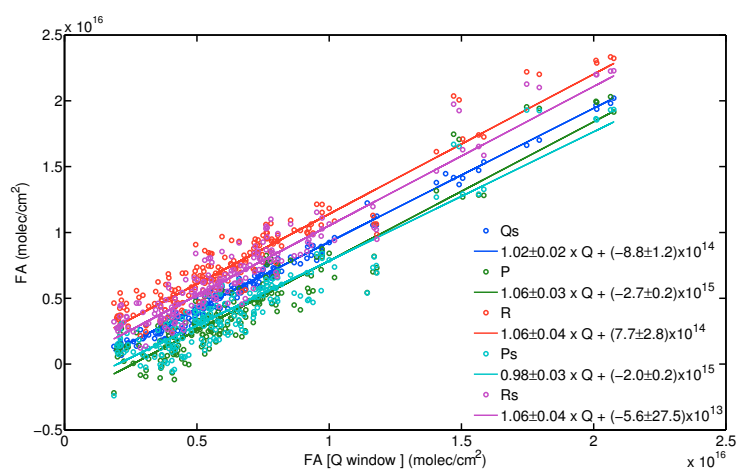

Fig. S1: Influence of the window on the retrieved FA total column at Paramaribo.

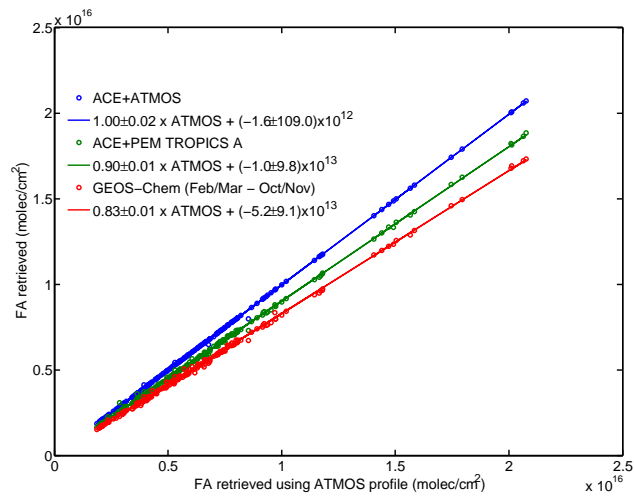

Fig. S2: Influence of FA a priori vertical profile on the retrieved FA total column at Paramaribo

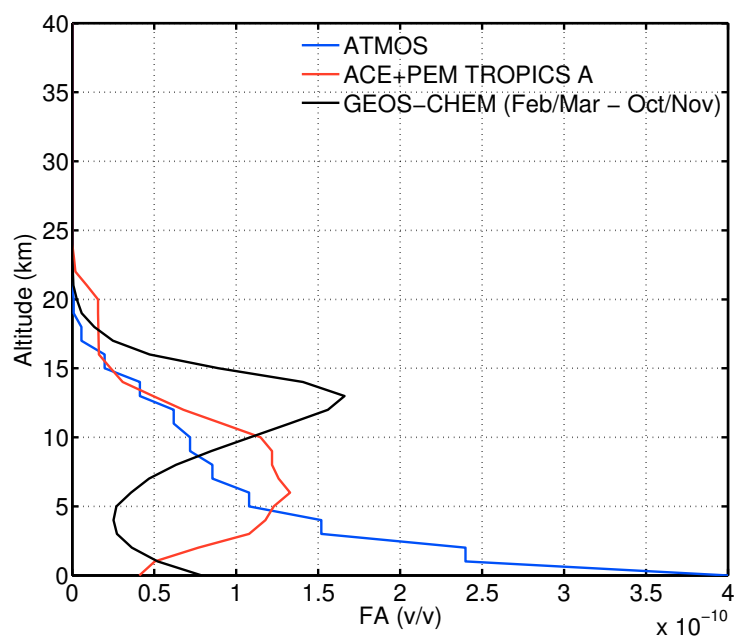

Fig. S3: A priori vertical profiles of FA used to retrieve FA total column.



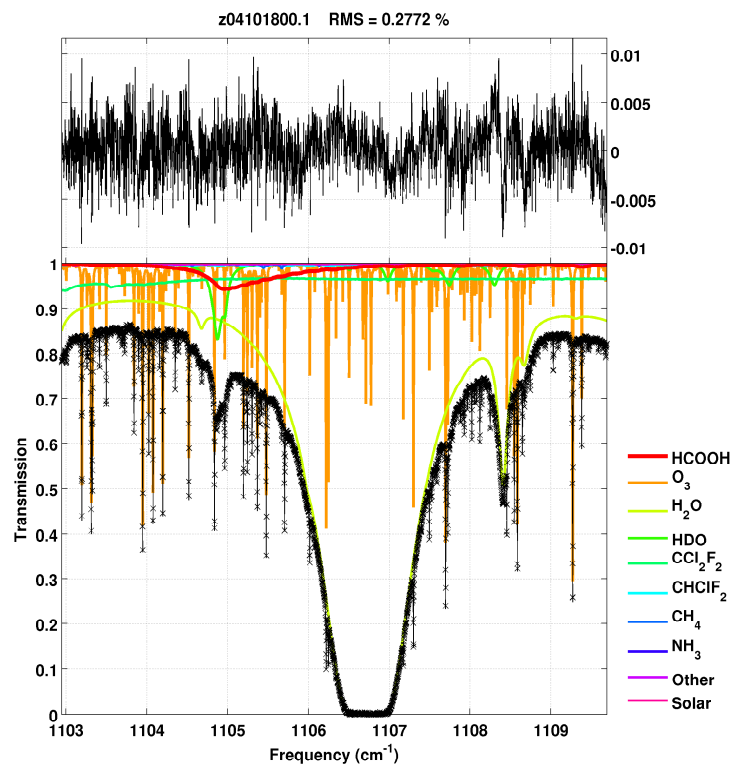

Fig. S4: An example of FA retrieval at Paramaribo using GFIT using the Q window. Top panel represent the fit residuals (computed - measured spectrum). Bottom panel represents the computed spectrum (black line), measured spectrum (black crosses) as well as the contribution of the different gases in the window used to retrieve FA. The weakness of FA absorption and the strong interference of H<sub>2</sub>O in the region make the retrieval of FA challenging. For this spectrum, the retrieved FA total column is  $1.02 \times 10^{16}$  molec/cm<sup>2</sup>.

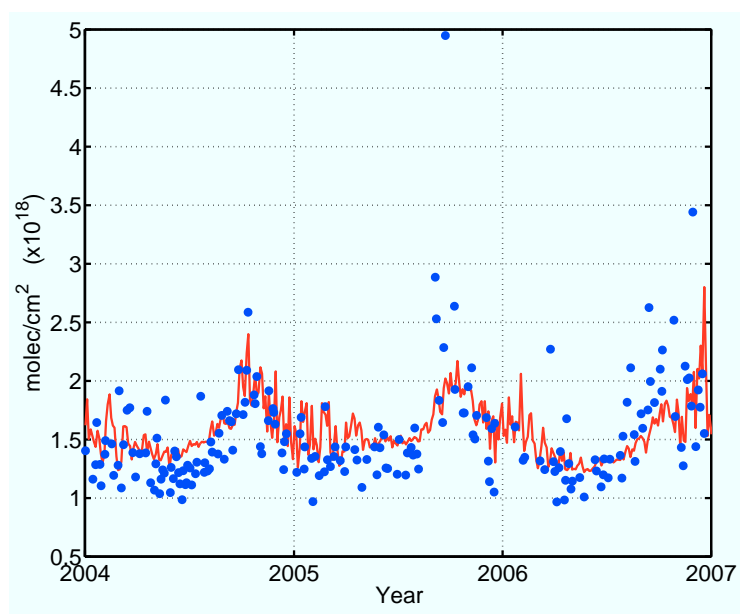

Fig. S5: Same as Fig. 3a for CO (Wollongong). Note the anomalously high CO at the end of 2007, reflecting intense biomass burning in the region.

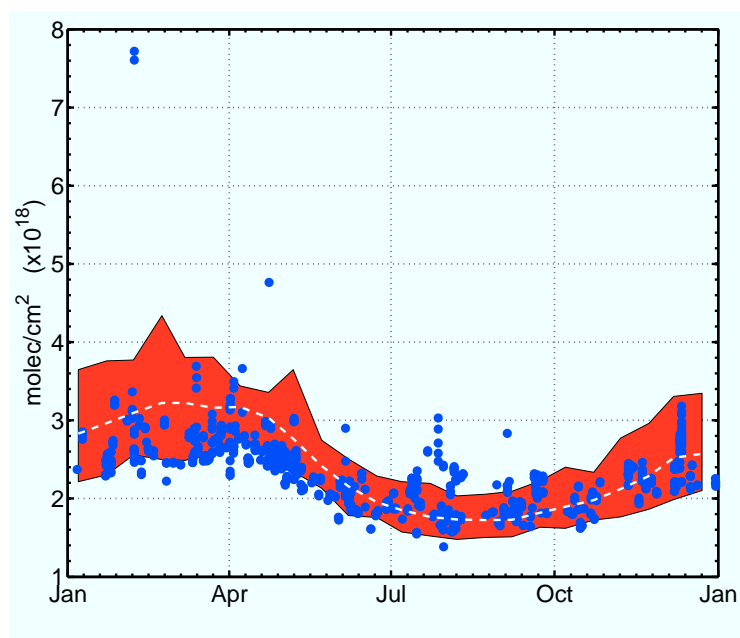

Fig. S6: Same as Fig. 4 for CO at Bremen

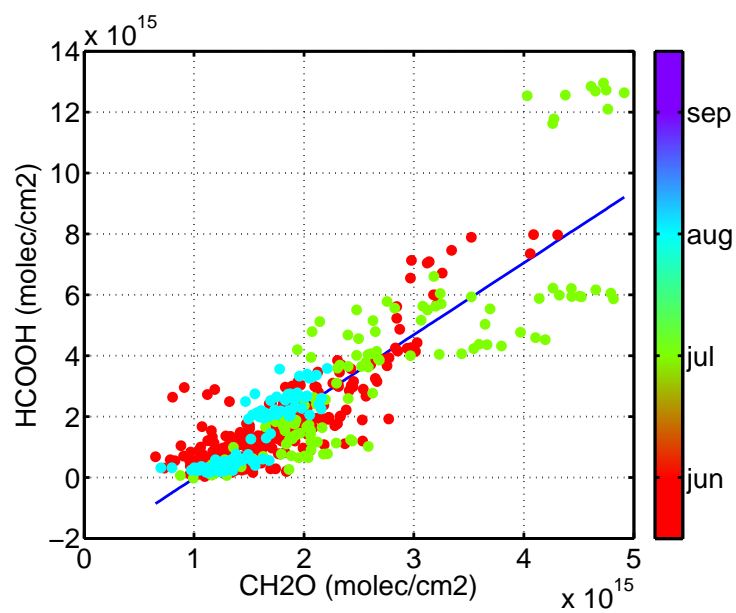

Fig. S7: Relationship between FA and CH<sub>2</sub>O at Barcroft ( $FA \simeq 2.3 \times CH_2O$ ,  $R^2 = 0.77$ )

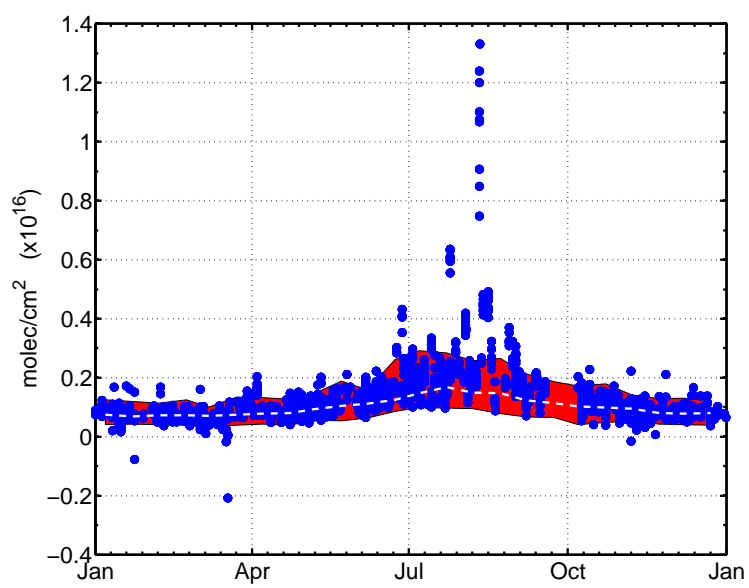

Fig. S8: Same as Fig. 4 for  $\text{CH}_2\text{O}$  at Barcroft

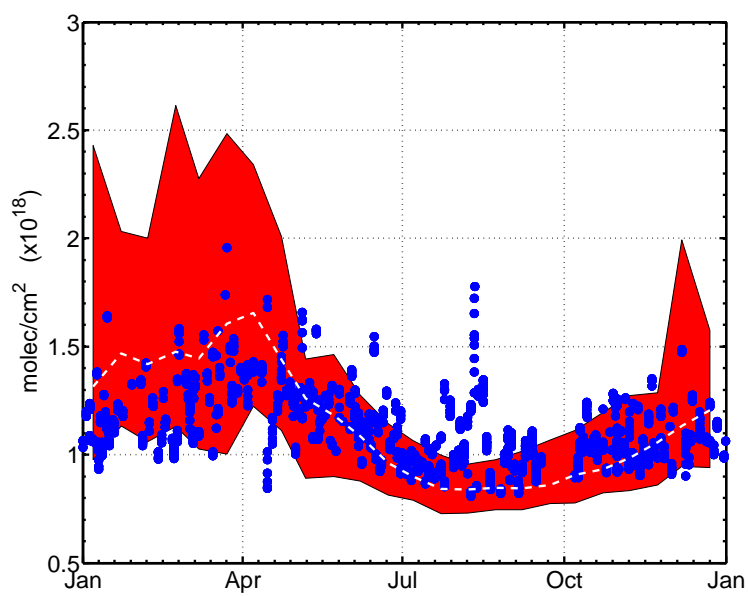

Fig. S9: Same as Fig. 4 for CO at Barcroft

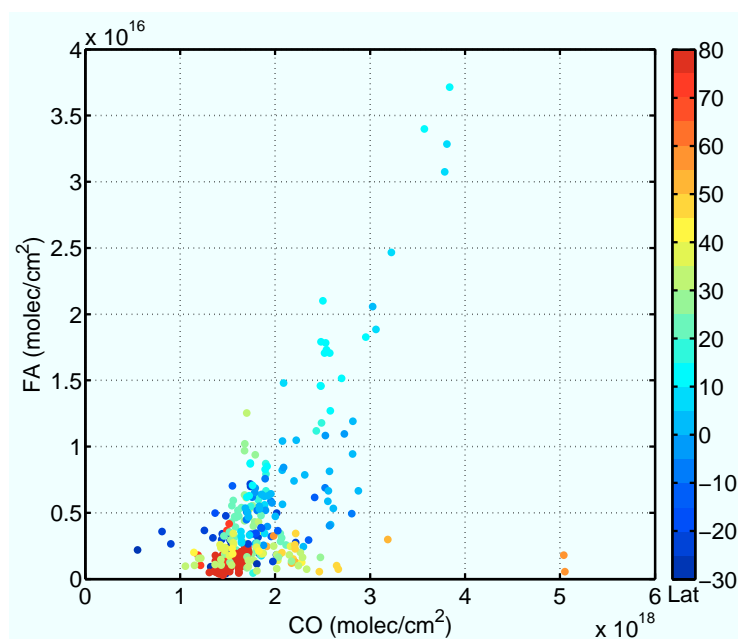

Fig. S10: Relationship between CO and FA total columns (molec/cm<sup>2</sup>) measured during cruises in the Atlantic Ocean.

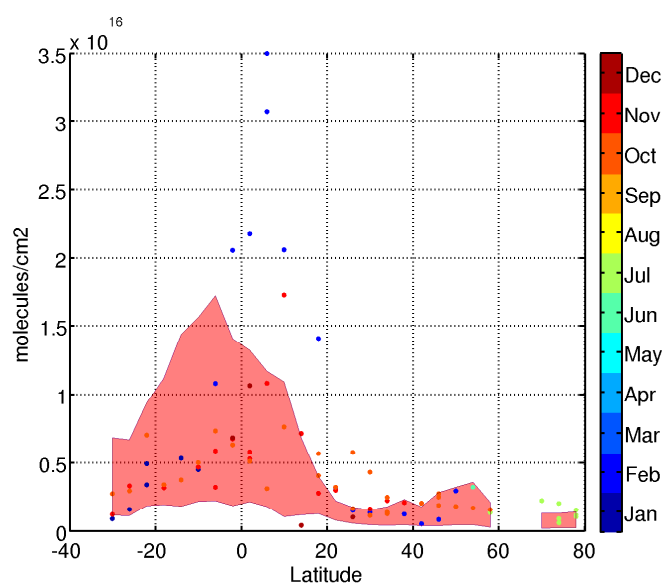

Fig. S11: Effect of a diffuse source of FA associated with aerosol aging on FA total column over the Atlantic (scenario R3). Color code same as Fig. 5.



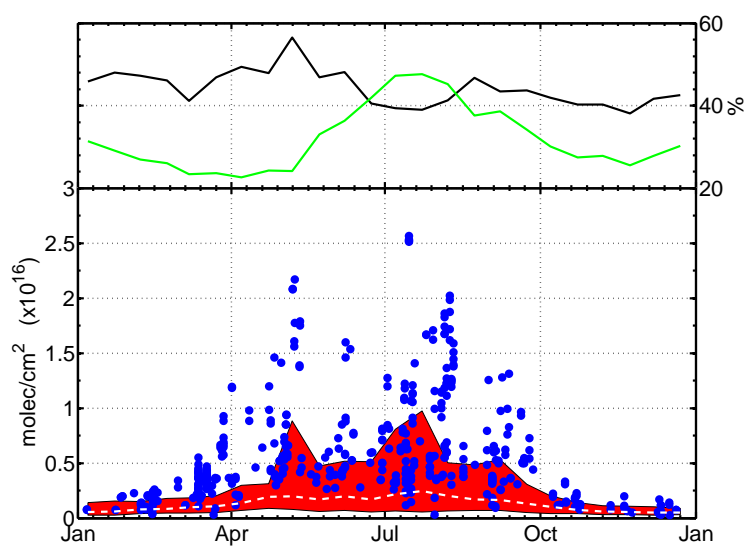

Fig. S12: Same as Fig. S10 for Bremen. Color code same as Fig. 4b.

Tab. S2: Regional and Global Burden for FA (in %)

|                                             | Tropics<br>(24°S – 24°N) |               | Mid latitudes<br>(24°N – 76°N) |               | Polar regions<br>(76°N – 90°N) |               | Global    |
|---------------------------------------------|--------------------------|---------------|--------------------------------|---------------|--------------------------------|---------------|-----------|
|                                             | (76°S – 24°S)            | (24°S – 24°S) | (24°N – 76°N)                  | (90°S – 76°S) | (76°N – 90°N)                  | (76°N – 90°N) |           |
| Biomass burning                             | 1.4                      | 0.7           | 1.3                            | 0.6           | 1.2                            | 1.2           | 1.2       |
| Biofuel                                     | 0.2                      | 0.1           | 0.5                            | 0.0           | 0.4                            | 0.2           | 0.2       |
| Terrestrial vegetation                      | 2.6                      | 2.4           | 2.4                            | 1.4           | 1.3                            | 2.4           | 2.4       |
| Soil                                        | 2.0                      | 1.1           | 3.3                            | 0.8           | 0.9                            | 2.0           | 2.0       |
| Anthropogenic<br>(Fossil fuel + Cattle)     | 0.6                      | 0.3           | 7.0                            | 0.1           | 3.7                            | 1.7           | 1.7       |
| Photooxidation<br>(biogenic)                | 82.5                     | 82.7          | 64.2                           | 76.2          | 55.5                           | 79.2          | 79.2      |
| Photooxidation<br>(Anthropogenic + Biomass) | 10.7                     | 12.7          | 21.3                           | 20.9          | 37.0                           | 13.3          | 13.3      |
| Overall                                     | 58.9                     | 22.4          | 17.8                           | 0.4           | 0.5                            | 10.7          | 10.7 Gmol |

Tab. S3: Regional and Global Burden for AA (in %)

|                                             | Tropics<br>(24°S – 24°N) |               | Mid latitudes<br>(76°N – 24°S) |               | Polar regions<br>(76°N – 90°N) |               | Global |
|---------------------------------------------|--------------------------|---------------|--------------------------------|---------------|--------------------------------|---------------|--------|
|                                             | (24°S – 24°N)            | (76°S – 24°S) | (76°N – 24°N)                  | (90°S – 76°S) | (76°N – 90°N)                  | (76°N – 90°N) |        |
| Biomass burning                             | 12.3                     | 6.0           | 8.2                            | 3.7           | 6.7                            | 10.2          |        |
| Biofuel                                     | 3.6                      | 1.5           | 12.1                           | 0.7           | 9.7                            | 4.7           |        |
| Terrestrial vegetation                      | 2.4                      | 2.4           | 2.2                            | 1.0           | 1.1                            | 2.4           |        |
| Soil                                        | 2.6                      | 1.4           | 2.6                            | 0.7           | 0.7                            | 2.3           |        |
| Anthropogenic<br>(Fossil fuel + Cattle)     | 0.7                      | 0.4           | 9.3                            | 0.2           | 4.7                            | 2.2           |        |
| Photooxidation<br>(biogenic)                | 77.2                     | 86.5          | 64.2                           | 91.1          | 74.4                           | 76.9          |        |
| Photooxidation<br>(Anthropogenic + Biomass) | 1.2                      | 1.6           | 1.4                            | 2.6           | 2.7                            | 1.3           |        |
| Overall                                     | 61.4                     | 20.2          | 17.7                           | 0.2           | 0.5                            | 9.1 Gmol      |        |

Tab. S4: Photochemical sources of FA and AA implemented in the GEOS-Chem chemical mechanisms. Acronyms are detailed in Table . HC5: Hydroxymethylbutenal (from isoprene), ISOP: isoprene, IEPOX: Dihydroxyepoxide from isoprene photooxidation,  $\delta$  - ISOPN: Organic nitrates from isoprene (1,4 and 4,1 additions), MACR: methacrolein, MBO: Methylbutenol, MONX: lumped monoterpenes, MVK: Methylvinylketone, PRPE: propene +  $\geq 4C$  alkene

|                                                      |   |                         |                                                                                                                                                 |
|------------------------------------------------------|---|-------------------------|-------------------------------------------------------------------------------------------------------------------------------------------------|
| PRPE + O <sub>3</sub>                                | → | 0 · 148 FA + 0 · 096 AA | Assume 3:2 relationship between [CH <sub>3</sub> CHOO]* + HCHO channel and CH <sub>3</sub> CHO + [CH <sub>2</sub> OO]* channel<br>Carter (2010) |
| ISOP + O <sub>3</sub>                                | → | 0 · 204 FA              | Derived from Aschmann et al. (1996); Grosjean et al. (1993)                                                                                     |
| MVK + O <sub>3</sub>                                 | → | 0 · 352 FA              | Derived from Aschmann et al. (1996); Grosjean et al. (1993)                                                                                     |
| MACR + O <sub>3</sub>                                | → | 0 · 326 FA              | Assumed to be similar to isoprene                                                                                                               |
| HC <sub>5</sub> + O <sub>3</sub>                     | → | 0 · 200 FA              | Carter (2010)                                                                                                                                   |
| C <sub>2</sub> H <sub>4</sub> + O <sub>3</sub>       | → | 0 · 370 FA              | cf. Main text                                                                                                                                   |
| MONX + O <sub>3</sub>                                | → | 0 · 075 FA + 0 · 080 AA | Carrasco et al. (2007)                                                                                                                          |
| MBO + O <sub>3</sub>                                 | → | 0 · 300 FA              | Atkinson et al. (2006)                                                                                                                          |
| CH <sub>3</sub> C(O)O <sub>2</sub> + HO <sub>2</sub> | → | 0 · 150 AA              | From the alcohol+carbonyl channel Lightfoot et al. (1992)                                                                                       |
| CH <sub>3</sub> C(O)O <sub>2</sub> + RO <sub>2</sub> | → | 0 · 110 AA              | Hatakeyama et al. (1986)                                                                                                                        |
| C <sub>2</sub> H <sub>2</sub> + OH                   | → | 0 · 4FA                 | Butkovskaya et al. (2006a)                                                                                                                      |
| GLYC + OH                                            | → | $\alpha(T)(FA + AA)$    | Reactions (R1) and (R2)                                                                                                                         |
| HAC + OH                                             | → | $\beta(T)(FA + AA)$     | Butkovskaya et al. (2006b)                                                                                                                      |
| IEPOX + OH + NO/HO <sub>2</sub>                      | → | 0 · 074 FA              | Reaction (R3)                                                                                                                                   |
| ISOPN $\delta$ + OH + NO                             | → | 0 · 310FA               | Paulot et al. (2009b)                                                                                                                           |
| MACRN + OH + NO                                      | → | 0 · 08AA + 0 · 07FA     | Paulot et al. (2009a)                                                                                                                           |
| MVKN + OH                                            | → | 0 · 650 FA              | Paulot et al. (2009a)                                                                                                                           |

## References

- S. M. Aschmann, J. Arey, and R. Atkinson. OH radical formation from the gas-phase reactions of O<sub>3</sub> with methacrolein and methyl vinyl ketone. *Atmos. Environ.*, 30(17):2939 – 2943, 1996. ISSN 1352-2310. doi: 10.1016/1352-2310(96)00013-1.
- R. Atkinson, D. L. Baulch, R. A. Cox, J. N. Crowley, R. F. Hampson, R. G. Hynes, M. E. Jenkin, M. J. Rossi, J. Troe, and I. Subcommittee. Evaluated kinetic and photochemical data for atmospheric chemistry: Volume ii - gas phase reactions of organic species. *Atmos. Chem. Phys.*, 6(11):3625–4055, 2006. ISSN 1680-7316.
- N. I. Butkovskaya, N. Pouvesle, A. Kukui, and G. L. Bras. Mechanism of the OH-initiated oxidation of glycolaldehyde over the temperature range 233-296 K. *J. Phys. Chem. A*, 110(50):13492–13499, 2006a. doi: 10.1021/jp064993k.
- N. I. Butkovskaya, N. Pouvesle, A. Kukui, Y. Mu, and G. Le Bras. Mechanism of the OH-initiated oxidation of hydroxyacetone over the temperature Range 236-298 K. *J. Phys. Chem. A*, 110(21):6833–6843, 2006b. doi: 10.1021/jp056345r.
- N. Carrasco, J. Doussin, M. O’Connor, J. Wenger, B. Picquet-Varrault, R. Durand-Jolibois, and P. Carlier. Simulation chamber studies of the atmospheric oxidation of 2-methyl-3-buten-2-ol: Reaction with hydroxyl radicals and ozone under a variety of conditions. *J. Atmos. Chem.*, 56(1):33–55, 2007. doi: 10.1007/s10874-006-9041-y.
- W. P. Carter. Development of a condensed saprc-07 chemical mechanism. *Atmos. Environ.*, 44(40):5336 – 5345, 2010. ISSN 1352-2310. doi: 10.1016/j.atmosenv.2010.01.024.
- G. González Abad, P. F. Bernath, C. D. Boone, S. D. McLeod, G. L. Manney, and G. C. Toon. Global distribution of upper tropospheric formic acid from the ace-fts. *Atmos. Chem. Phys.*, 9(20):8039–8047, 2009. doi: 10.5194/acp-9-8039-2009.
- D. Grosjean, E. L. Williams, and E. Grosjean. Atmospheric chemistry of isoprene and of its carbonyl products. *Environ. Sci. Technol.*, 27(5):830–840, 1993. doi: 10.1021/es00042a004.
- J. W. Hannigan, M. T. Coffey, and A. Goldman. Semiautonomous FTS Observation System for Remote Sensing of Stratospheric and Tropospheric Gases. *J. Atmos. Oceanic Technol.*, 26:1814–1828, 2009. doi: 10.1175/2009JTECHA1230.1.
- S. Hatakeyama, N. Washida, and H. Akimoto. Rate constants and mechanisms for the reaction of hydroxyl (OH) radicals with acetylene, propyne, and 2-butyne in air at 297±2 K. *J. Phys. Chem.*, 90(1):173–178, 1986. doi: 10.1021/j100273a039.

- 
- J. M. Hoell, D. D. Davis, D. J. Jacob, M. O. Rodgers, R. E. Newell, H. E. Fuelberg, R. J. McNeal, J. L. Raper, and R. J. Bendura. Pacific Exploratory Mission in the tropical Pacific: PEM-Tropics A, August-September 1996. *J. Geophys. Res.*, 104:5567–5584, 1999. doi: 10.1029/1998JD100074.
- E. Kalnay, M. Kanamitsu, R. Kistler, W. Collins, D. Deaven, L. Gandin, M. Iredell, S. Saha, G. White, J. Woollen, et al. The NCEP/NCAR 40-Year Reanalysis Project. *Bull. Am. Meteorol. Soc.*, 77(3):437–471, 1996.
- P. D. Lightfoot, R. A. Cox, J. N. Crowley, M. Destriau, G. D. Hayman, M. E. Jenkin, G. K. Moortgat, and F. Zabel. Organic peroxy radicals: Kinetics, spectroscopy and tropospheric chemistry. *Atmos. Environ.*, 26(10):1805–1961, 1992.
- F. Paulot, J. D. Crouse, H. G. Kjaergaard, J. H. Kroll, J. H. Seinfeld, and P. O. Wennberg. Isoprene photooxidation: new insights into the production of acids and organic nitrates. *Atmos. Chem. Phys.*, 9(4):1479–1501, 2009a. ISSN 1680-7316.
- F. Paulot, J. D. Crouse, H. G. Kjaergaard, A. Kurten, J. M. St. Clair, J. H. Seinfeld, and P. O. Wennberg. Unexpected Epoxide Formation in the Gas-Phase Photooxidation of Isoprene. *Science*, 325(5941):730–733, 2009b. doi: 10.1126/science.1172910.
- C. P. Rinsland, N. B. Jones, B. J. Connor, J. A. Logan, N. S. Pougatchev, A. Goldman, F. J. Murcray, T. M. Stephen, A. S. Pine, R. Zander, E. Mahieu, and P. Demoulin. Northern and southern hemisphere ground-based infrared spectroscopic measurements of tropospheric carbon monoxide and ethane. *J. Geophys. Res.*, 103:28197–28218, November 1998. doi: 10.1029/98JD02515.
- C. Rodgers. *Inverse methods for atmospheric sounding: Theory and practice*, volume 2 of *Atmospheric, Ocean and Planetary Physics*. World Scientific Singapore, 2000.
- J. M. Russell, III, L. L. Gordley, J. H. Park, S. R. Drayson, W. D. Hesketh, R. J. Cicerone, A. F. Tuck, J. E. Frederick, J. E. Harries, and P. J. Crutzen. The Halogen Occultation Experiment. *J. Geophys. Res.*, 98:10777–10797, June 1993. doi: 10.1029/93JD00799.
- C. Senten, M. De Mazière, B. Dils, C. Hermans, M. Kruglanski, E. Neefs, F. Scollas, A. C. Vandaele, G. Vanhaelewyn, C. Vigouroux, M. Carleer, P. F. Coheur, S. Fally, B. Barret, J. L. Baray, R. Delmas, J. Leveau, J. M. Metzger, E. Mahieu, C. Boone, K. A. Walker, P. F. Bernath, and K. Strong. Technical Note: New ground-based FTIR measurements at Ile de La Réunion: observations, error analysis, and comparisons with independent data. *Atmos. Chem. Phys.*, 8(13):3483–3508, 2008. doi: 10.5194/acp-8-3483-2008.

- A. Thompson, J. Witte, R. McPeters, S. Oltmans, F. Schmidlin, J. Logan, M. Fujiwara, V. Kirchhoff, F. Posny, G. Coetzee, et al. Southern Hemisphere Additional Ozonesondes (SHADOZ) 1998–2000 tropical ozone climatology: 1. Comparison with Total Ozone Mapping Spectrometer (TOMS) and ground-based measurements. *J. Geophys. Res.*, 108(D2):8238, 2003. doi: 10.1029/2001JD000967.
- J. Vander Auwera, K. Didriche, A. Perrin, and F. Keller. Absolute line intensities for formic acid and dissociation constant of the dimer. *J. Chem. Phys.*, 126(12):124311–124320, 2007. doi: 10.1063/1.2712439.
- D. Wunch, G. C. Toon, J.-F. L. Blavier, R. Washenfelder, J. Notholt, B. J. Connor, D. W. T. Griffith, V. Sherlock, and P. O. Wennberg. The Total Carbon Column Observing Network (TCCON). *Philos. Trans. R. Soc. London, Ser. A*, Accepted, 2010.
